# Supplementary material for: Genome-Wide Analysis of C2H2 Zinc-Finger Family Transcription Factors and Their Responses to Abiotic Stresses in Poplar (Populus trichocarpa)
Source: PLoS One. 2015 Aug 3;10(8):e0134753. doi: 10.1371/journal.pone.0134753 (PMC4523194; doi:10.1371/journal.pone.0134753)
Supplement: S2 Table — (XLSX) [file pone.0134753.s002.xlsx]

## Sheet: Sheet1
Gene name	Accession number	Arabidopsis ortholog locus	Length (a.a.)	M.W. (Da)	pI	Localization	Number of C2H2 motif
PtrZFP1	POPTR_0001s27490	AT3G57670.1	400	44849.8	8.25	nucleus	2
PtrZFP2	POPTR_0001s30260	AT1G27730.1	240	25363.3	8.45	nucleus	1
PtrZFP3	POPTR_0001s14780	AT1G80730.1	286	31703.3	8.33	nucleus	1
PtrZFP4	POPTR_0004s19460	AT1G08290.1	333	37848.2	8.8	nucleus	2
PtrZFP5	POPTR_0009s14590	AT1G08290.1	335	37907.1	8.75	nucleus	2
PtrZFP6	POPTR_0009s06700	AT3G57670.1	310	35368	8.5	nucleus	2
PtrZFP7	POPTR_0007s05340	AT1G34370.1	358	39381.4	5.94	chloroplast	1
PtrZFP8	POPTR_0007s12130	AT2G23740.1	1517	171961	5.85	nucleus	1
PtrZFP9	POPTR_0010s13910	AT1G13290.1	275	31096.8	7.63	nucleus	2
PtrZFP10	POPTR_0014s06150	AT2G45120.1	317	35655	8.52	nucleus	2
PtrZFP11	POPTR_0015s12910	AT4G25610.1	687	76685.1	8.4	nucleus	1
PtrZFP12	POPTR_0016s08990	AT5G03150.1	405	44606.2	9.4	nucleus	2
PtrZFP13	POPTR_0018s02320	AT5G25160.1	252	28549.5	6.76	nucleus	1
PtrZFP14	POPTR_0004s22650	AT2G28200.1	283	31164.9	8.63	nucleus	1
PtrZFP15	POPTR_0004s22670	AT5G22890.1	406	45330.1	8.54	nucleus	1
PtrZFP16	POPTR_0022s00900	AT4G06634.1	375	43079.7	6.09	cytoplasm	5
PtrZFP17	POPTR_0014s02520	AT5G52010.1	419	47803.1	6.69	chloroplast	1
PtrZFP18	POPTR_0013s11300	AT1G72050.1	370	43454.4	8.61	nucleus	6
PtrZFP19	POPTR_0002s09840	AT1G34790.1	273	30606.9	8.78	nucleus	1
PtrZFP20	POPTR_0002s08810	AT1G75710.1	425	47302.9	9.23	nucleus	1
PtrZFP21	POPTR_0002s12010	AT1G27730.1	252	27162.3	7.7	nucleus	1
PtrZFP22	POPTR_0003s20400	AT3G57670.1	336	37858.2	8.1	nucleus	2
PtrZFP23	POPTR_0003s17900	AT5G10970.1	285	31841.4	6.67	nucleus	1
PtrZFP24	POPTR_0006s27760	AT1G80730.1	288	31843.3	8.83	nucleus	1
PtrZFP25	POPTR_0008s03760	AT5G04240.1	1621	180459	5.8	nucleus	1
PtrZFP26	POPTR_0012s13010	AT4G25610.1	731	81532.6	6.73	nucleus	1
PtrZFP27	POPTR_0001s31990	AT1G49900.1	837	93693	5.81	nucleus	1
PtrZFP28	POPTR_0002s04250	AT4G17810.1	184	20759.3	4.96	nucleus	1
PtrZFP29	POPTR_0002s14450	AT2G45120.1	478	53354.2	6	nucleus	1
PtrZFP30	POPTR_0002s20020	AT1G67030.1	188	20949.8	9.25	nucleus	1
PtrZFP31	POPTR_0003s07180	AT1G30970.1	451	50039.9	8.95	nucleus	1
PtrZFP32	POPTR_0004s08240	AT1G66140.1	238	25580.3	5.34	nucleus	1
PtrZFP33	POPTR_0009s09250	AT3G19580.1	250	26305.1	8.83	nucleus	1
PtrZFP34	POPTR_0009s04850	AT2G29660.1	382	42559.7	8.58	nucleus	1
PtrZFP35	POPTR_0009s03280	AT5G59820.1	193	21035.4	9.57	chloroplast	1
PtrZFP36	POPTR_0005s16280	AT5G09740.1	457	53197.9	6.92	nucleus	1
PtrZFP37	POPTR_0005s23660	AT4G02670.1	474	51942.2	9.15	nucleus	2
PtrZFP38	POPTR_0006s09020	AT3G53820.1	164	18133.2	5.7	nucleus	1
PtrZFP39	POPTR_0008s03220	AT5G04390.1	303	33750.1	7.74	nucleus	2
PtrZFP40	POPTR_0008s12210	AT1G68360.1	245	25899.7	8.78	nucleus	1
PtrZFP41	POPTR_0010s04580	AT1G10480.1	261	29434.5	7.56	nucleus	1
PtrZFP42	POPTR_0010s10940	AT2G02070.1	547	59245.7	9.43	nucleus	2
PtrZFP43	POPTR_0010s11330	AT1G66140.1	247	26909	6.24	nucleus	1
PtrZFP44	POPTR_0010s15060	AT5G14010.1	183	19886.8	9.73	nucleus	1
PtrZFP45	POPTR_0010s16710	AT1G26610.1	497	54970.3	8.93	nucleus	1
PtrZFP46	POPTR_0012s03730	AT2G01940.1	456	51100.4	8.85	nucleus	2
PtrZFP47	POPTR_0016s02800	AT5G10970.1	190	21448.1	9.91	nucleus	1
PtrZFP48	POPTR_0016s10790	AT5G03510.1	295	32240	8.57	nucleus	2
PtrZFP49	POPTR_0017s12740	AT5G67450.1	549	60996.3	8.35	nucleus	3
PtrZFP50	POPTR_0025s00650	AT1G80730.1	294	31832.1	9.06	nucleus	1
PtrZFP51	POPTR_0005s15460	AT1G68360.1	239	26505.2	9.69	chloroplast	1
PtrZFP52	POPTR_0006s06260	AT5G25160.1	293	31966.3	7.13	nucleus	1
PtrZFP53	POPTR_0014s15450	AT4G15420.1	567	63279.8	6.22	nucleus	1
PtrZFP54	POPTR_0006s11770	AT5G03740.1	271	29675.7	5.4	nucleus	1
PtrZFP55	POPTR_0001s15790	AT2G45120.1	314	35012.4	6	nucleus	2
PtrZFP56	POPTR_0001s02530	AT4G17810.1	245	27273.2	5.57	nucleus	1
PtrZFP57	POPTR_0017s04840	AT5G44160.1	471	51791.4	9.36	nucleus	2
PtrZFP58	POPTR_0001s25700	AT2G29660.1	380	42654.2	8.99	nucleus	1
PtrZFP59	POPTR_0009s15160	AT3G44750.1	279	30313.5	4.75	nucleus	1
PtrZFP60	POPTR_0009s01020	AT2G28200.1	313	34283.4	7.21	nucleus	1
PtrZFP61	POPTR_0008s13730	AT1G66140.1	247	27057.3	6.71	nucleus	1
PtrZFP62	POPTR_0010s20740	AT5G06070.1	290	32331.2	8.42	nucleus	1
PtrZFP63	POPTR_0012s09390	AT3G48430.1	1685	191195	9.01	nucleus	3
PtrZFP64	POPTR_0016s10460	AT2G37740.1	322	36836.2	7.96	nucleus	1
PtrZFP65	POPTR_0005s02730	AT1G03840.1	519	55978.7	9.15	nucleus	2
PtrZFP66	POPTR_0013s11900	AT1G34370.1	509	56463.1	5.76	nucleus	1
PtrZFP67	POPTR_0004s23050	AT4G06634.1	378	43525.2	6.06	cytoplasm	5
PtrZFP68	POPTR_0001s24250	AT2G37430.1	197	21346.6	9.62	nucleus	1
PtrZFP69	POPTR_0001s05630	AT3G57670.1	323	36670.1	8.7	nucleus	2
PtrZFP70	POPTR_0005s13810	AT2G23740.1	1457	165221	6.25	nucleus	4
PtrZFP71	POPTR_0010s23160	AT5G04240.1	1378	153626	6.27	nucleus	3
PtrZFP72	POPTR_0014s01760	AT1G27730.1	248	26653.8	8.4	nucleus	1
PtrZFP73	POPTR_0019s11040	AT1G72050.1	298	34806	8.93	nucleus	3
PtrZFP74	POPTR_0001s33210	AT5G14010.1	197	21686.9	7.89	nucleus	1
PtrZFP75	POPTR_0002s09010	AT5G64610.1	445	51832.5	7.2	nucleus	1
PtrZFP76	POPTR_0002s09790	AT1G22310.1	1276	139605	4.96	nucleus	1
PtrZFP77	POPTR_0002s14460	AT2G45120.1	332	37584.9	6.69	nucleus	3
PtrZFP78	POPTR_0017s02490	AT1G66140.1	258	27827.7	5.36	nucleus	1
PtrZFP79	POPTR_0003s07490	AT1G66140.1	265	29497	6.35	nucleus	2
PtrZFP80	POPTR_0003s19120	AT1G80730.1	302	33026.5	6.39	nucleus	1
PtrZFP81	POPTR_0004s11730	AT5G67450.1	565	63570.1	6.01	nucleus	3
PtrZFP82	POPTR_0005s17160	AT1G22310.1	915	100218	4.77	nucleus	1
PtrZFP83	POPTR_0005s24290	AT2G37740.1	185	20949.5	4.88	nucleus	1
PtrZFP84	POPTR_0006s02960	AT5G01860.1	173	18992.4	9.86	nucleus	1
PtrZFP85	POPTR_0006s09040	AT2G37740.1	301	34113.1	8.77	nucleus	1
PtrZFP86	POPTR_0006s24410	AT3G13810.1	461	50996.2	9.2	nucleus	2
PtrZFP87	POPTR_0008s05930	AT5G06070.1	304	33725.6	6.7	nucleus	1
PtrZFP88	POPTR_0008s09410	AT1G26610.1	509	56065.7	8.36	nucleus	1
PtrZFP89	POPTR_0008s16390	AT3G23130.1	215	23996.9	9.25	nucleus	1
PtrZFP90	POPTR_0008s16410	AT5G43540.1	193	21675.7	7.77	nucleus	1
PtrZFP91	POPTR_0009s04190	AT3G53820.1	205	23020.6	5.65	nucleus	1
PtrZFP92	POPTR_0009s16770	AT4G35280.1	297	32911.3	7.19	nucleus	1
PtrZFP93	POPTR_0010s08520	AT5G43540.1	192	21518.2	6.22	nucleus	1
PtrZFP94	POPTR_0010s08530	AT3G23130.1	213	23851.8	8.55	nucleus	1
PtrZFP95	POPTR_0010s23610	AT5G04390.1	301	33233.6	7.21	nucleus	2
PtrZFP96	POPTR_0014s06160	AT2G45120.1	477	53308.3	6.38	nucleus	1
PtrZFP97	POPTR_0014s11880	AT1G67030.1	189	20891.6	8.23	nucleus	1
PtrZFP98	POPTR_0016s05310	AT3G57670.1	358	40936.6	6.57	nucleus	1
PtrZFP99	POPTR_0016s10480	AT3G53820.1	161	17626.3	5.39	nucleus	1
PtrZFP100	POPTR_0025s00660	AT5G10970.1	303	33259.1	9.08	nucleus	1
PtrZFP101	POPTR_0019s11520	AT1G34370.1	506	56172.6	6.05	nucleus	1
PtrZFP102	POPTR_0003s09000	AT4G17810.1	239	26519.2	6.03	nucleus	1
PtrZFP103	POPTR_0018s10230	AT5G57520.1	168	18643.6	8.53	nucleus	1
PtrZFP104	POPTR_0011s17190	AT3G60580.1	342	38191.3	8.23	nucleus	1
PtrZFP105	POPTR_0001s16080	AT1G30970.1	442	48741.8	7.64	nucleus	1
PtrZFP106	POPTR_0001s00800	AT2G45120.1	248	27879.7	9.23	nucleus	2
PtrZFP107	POPTR_0005s12710	AT5G66730.1	530	55422.2	8.15	nucleus	2
PtrZFP108	POPTR_0005s24280	AT2G42410.1	196	22529.6	8.87	nucleus	1
PtrZFP109	POPTR_0008s13980	AT2G01940.1	424	47050.6	7.86	nucleus	2
